# Supplementary material for: FaMYB44.2, a transcriptional repressor, negatively regulates sucrose accumulation in strawberry receptacles through interplay with FaMYB10
Source: PubMed Central journal article supplement (PMC6137983; doi:10.1093/jxb/ery249), 2018-08-02
Supplement: ery249_suppl_supplementary_figures_s1-s5_tables_s2-s9.pdf [file ery249_suppl_supplementary_figures_s1-s5_tables_s2-s9.pdf]

## Supplementary Data

### **FaMYB44.2 negatively regulates sucrose accumulation in strawberry receptacles through interplay with FaMYB10**

Lingzhi Wei, Wenwen Mao, Meiru Jia, Sinian Xing, Usman Ali, Yaoyao Zhao, Yating Chen, Minglin Cao, Zhengrong Dai, Kai Zhang, Zhechao Dou, Wensuo Jia and Bingbing Li

### **Figures and Tables**

**Fig. S1.** The effects of *FaSPS3*-OE on sucrose accumulation in strawberry fruits.

**Fig. S2.** Detect the expression levels of *FaACTIN*, *FaSUS* and *FaSPS3* in strawberry fruits.

**Fig. S3.** The expression levels of *miRNA* and *MADS* in transgenic *FaMYB44.2* and *FaMADS9* fruits.

**Fig. S4.** Identify the interaction proteins of FaMYB44.2 and FaMYB10 by yeast two-hybrid assay.

**Fig. S5.** The effects of FaMDS9 on FaMYB44.2/FaMYB10-mediated P<sub>FaSPS3</sub> activity.

**Table S1.** The full-length protein sequences for MYB44 and MYB1 genes.

**Table S2.** Primers used for vector construction.

**Table S3.** Primers used for gene expression analysis by qRT-PCR.

**Table S4.** Primers used to construct the vectors for the GUS activity assay.

**Table S5.** Probes used for the EMSA.

**Table S6.** Sequences and primers used for microRNA expression analysis by qRT-PCR.

**Table S7.** Primers used for gene expression analysis by RT-PCR.

**Table S8.** *FaSUS*, *FaSPS* and *FabHLH33* expression at different developmental and ripening stages according to RNA-sequence data.

**Table S9.** Quantitative analysis of *FaMYB10* and *FaMYB44.2* expression levels by qRT-PCR.

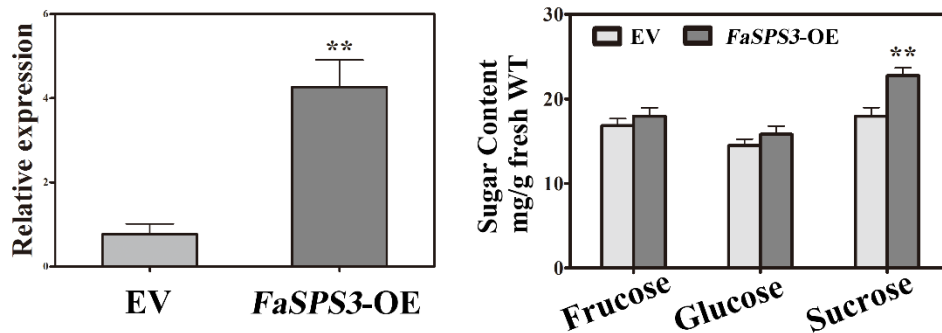

**Supplementary Figure S1. The effects of *FaSPS3*-OE on sucrose accumulation in strawberry fruits.** *FaSPS3* was overexpressed in white strawberry fruits using pBI121 vector, and the main sugar contents were analyzed by HPLC assay. Values are means  $\pm$  SD of three biological replicates and normalized using *FaACTIN* as an internal control. The  $\Delta$ CT of EV sample was chosen as the calibrator. Statistically significant were tested by Student's t test: \*P < 0.05 and \*\*P < 0.01. Thirty fruits were pooled as one sample and three biological replicates were performed.

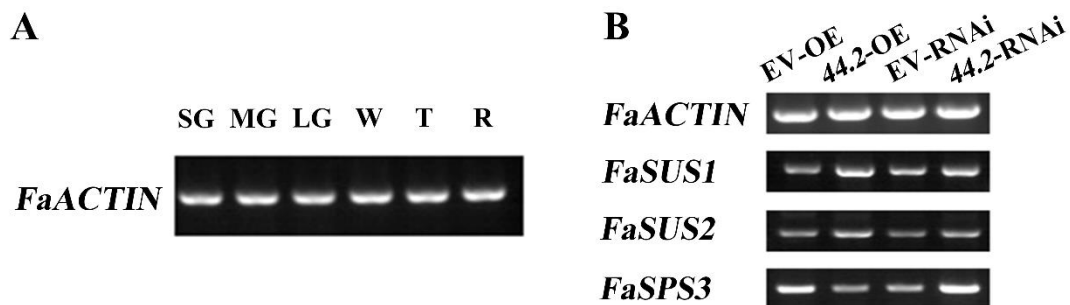

**Supplementary Figure S2. Detect the expression levels of *FaACTIN*, *FaSUS* and *FaSPS3* in strawberry fruits.** **A**, The expression pattern of *FaACTIN* during strawberry fruit ripening. SG, small green fruit; MG, middle green fruit; LG, large green fruit; W, white fruit; T, turning fruit and R, red fruit. **B**, The expression levels of *FaSUS1*, *FaSUS2* and *FaSPS3* in *FaMYB44.2*-OE and *FaMYB44.2*-RNAi fruits.

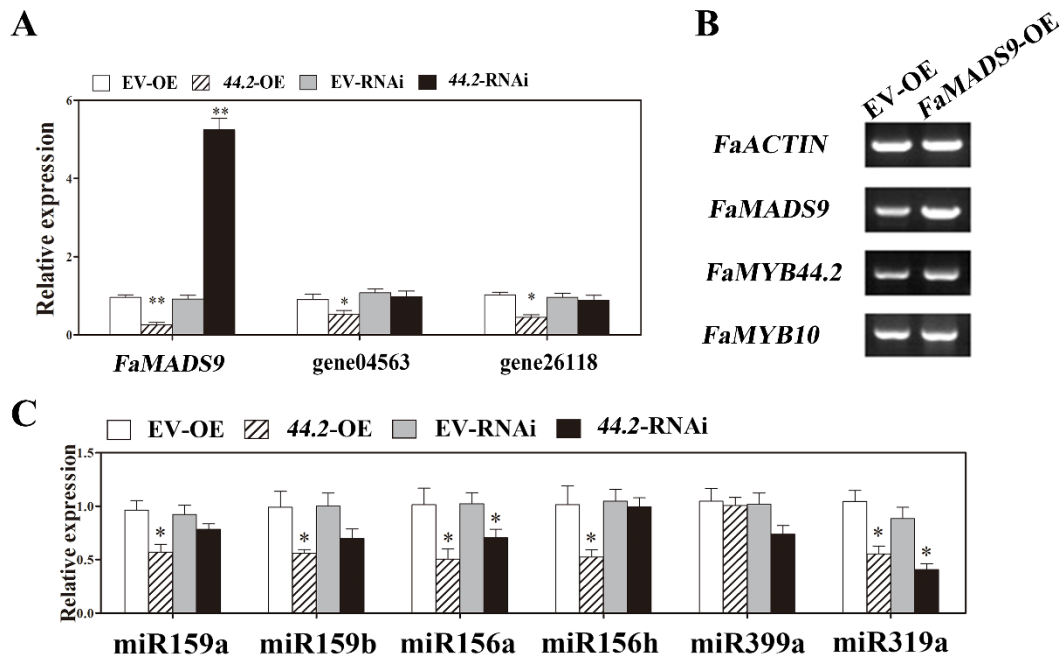

**Supplementary Figure S3. The expression levels of *miRNA* and *MADS* in transgenic *FaMYB44.2* and *FaMADS9* fruits.** **A**, The expression levels of *FaMADS9* and its homologues in *FaMYB44.2*-OE and *FaMYB44.2*-RNAi fruits (Feng, 2015). **B**, *FaMADS9* was overexpressed in white strawberry fruits using pSPYCE vector, and the expression of *FaMADS9*, *FaMYB44.2* and *FaMYB10* was analyzed with RT-PCR. **C**, The expression levels of *miRNA 159*, *miRNA156*, *miRNA399* and *miRNA319* (Liu and Carroll, 2010; Csukasi *et al.*, 2012; Ren and Tang, 2012; Yang *et al.*, 2013; Qian *et al.*, 2017) in *FaMYB44.2*-OE and *FaMYB44.2*-RNAi fruits. The primers for RT-PCR were listed in Table S7.

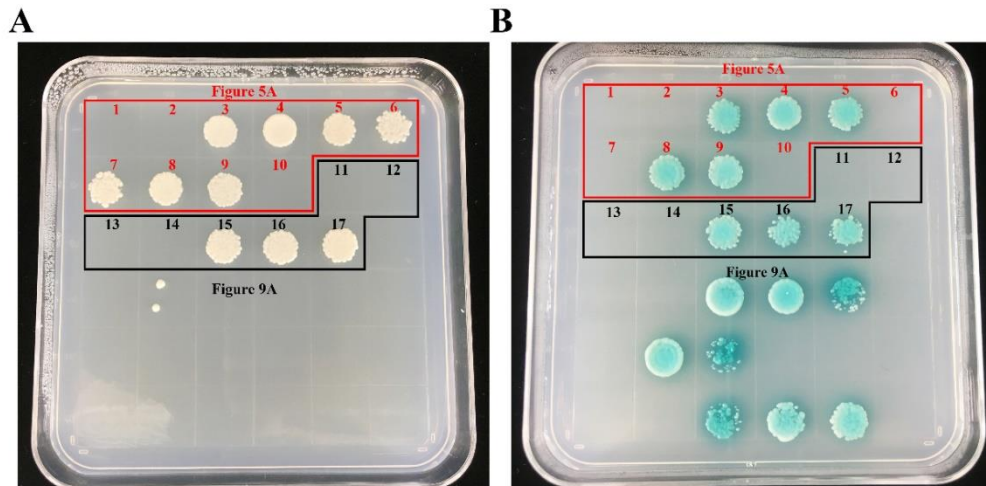

**Supplementary Figure S4. Identify the interaction proteins of FaMYB44.2 and FaMYB10 by yeast two-hybrid assay. A,  $-Leu/-Trp/-His$  (SD-3) of Fig. 5A. 1, pGAD+pGBK; 2, pGAD+BD-FaMYB44.2; 3, AD-FaMYB44.1+BD-FaMYB44.2; 4, AD-FaMYB44.2+BD-FaMYB44.2; 5, AD-FaMYB44.3+BD-FaMYB44.2; 6, AD-FabHLH3+BD-FaMYB44.2; 7, AD-FabHLH33+BD-FaMYB44.2; 8, AD-FaTTG1+BD-FaMYB44.2; 9, AD-FaMYB1+BD-FaMYB44.2; 10, AD-FaMYB10+BD-FaMYB44.2.  $-Leu/-Trp/-His$  (SD-3) of Fig. 9A. 11, pGAD+pGBK; 12, pGAD+BD-FabHLH3; 13, pGAD+BD-FabHLH33; 14, pGAD+BD-FaTTG1; 15, AD-FaMYB10+BD-FabHLH3; 16, AD-FaMYB10+BD-FabHLH33; 17, AD-FaMYB10+BD-FaTTG1. B,  $-Leu/-Trp/-His/-adenine$  (SD-4) of Fig. 5A and Fig. 9A. The panel was in the same order as shown in Fig. S4A.**

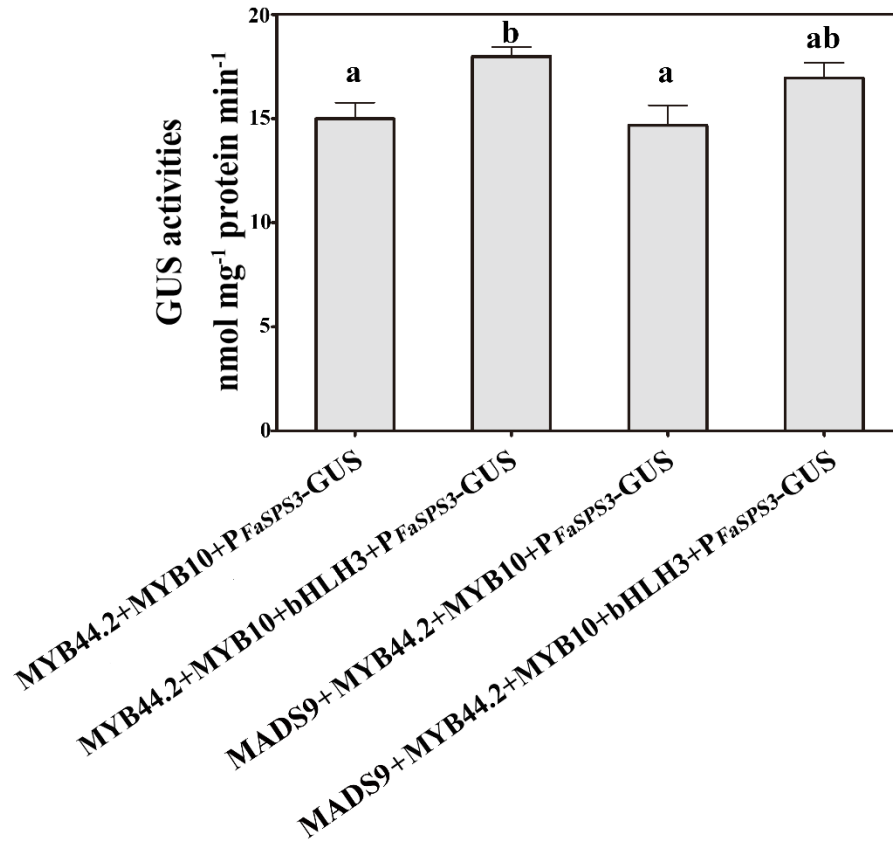

**Supplementary Figure S5. Detecting the effects of FaMDS9 on FaMYB44.2/FaMYB10-mediated P<sub>FaSPS3</sub> activity.**

**Table S1. The full-length protein sequences for MYB44 and MYB1 genes.** Please see the details in the attached Excel file.

**Table S2. Primers used for vector construction.** The restriction enzyme sites in the primer sequences are underlined.

| Primer name              | Enzyme sites     | Forward primer (5'-3')                        | Reverse primer (5'-3')                       |
|--------------------------|------------------|-----------------------------------------------|----------------------------------------------|
| <i>FaMYB44.2</i> -OE     | Gateway adapters | <u>AAAAAGCAGGCT</u> ATGGCTTCTTCTCA<br>ACCAAGA | AGAAAGCTGGGICTACTCCACC<br>TGCTAATCCCAA       |
| <i>FaMYB44.2</i> -RNAi-P | AscI/SwaI        | <u>GGCGGCCAT</u> CACCCCTTCTCTCTC<br>AGAACAA   | <u>ATTTAAATT</u> ACGCCGGCAGAC<br>TAGAATCGCTC |
| <i>FaMYB44.2</i> -RNAi-N | PacI/AvrII       | <u>TTAATTAAT</u> CACCCCTTCTCTCTCA<br>GAACAAG  | <u>CCTAGGGT</u> ACGCCGGCAGACT<br>AGAATCGC    |
| <i>FaSPS3</i> -OE        | BamHI/SacI       | <u>GGATCCATG</u> CCGAGGGTACCAGAAC             | <u>GAGTCCT</u> AGTTCTTGACAACCT<br>CTAATTTCTC |
| pGEX-4T-1-MYB44.2        | EcoRI/XhoI       | <u>GAATTCATG</u> GCTTCTTCAACCAAG<br>AAAGC     | <u>CTCGAGCT</u> ACTCCACCTTGCTAA<br>TCCCAATC  |

|                         |             |                                              |                                           |
|-------------------------|-------------|----------------------------------------------|-------------------------------------------|
| <b>Y2H-AD-FaMYB44.1</b> | EcoRI/BamHI | <u>GAATTC</u> ATGGCTATGAATCGGAAGGA           | <u>GGATCC</u> TCACTCAATTCTGCTGATC         |
| <b>Y2H-AD-FaMYB44.2</b> | NdeI/EcoRI  | CATATGATGGCTTCTTCTCAACCAG                    | <u>GAATTC</u> CTACTCCACCTTGCTAATCC        |
| <b>Y2H-BD-FaMYB44.2</b> | NdeI/EcoRI  | CATATGATGGCTTCTTCTCAACCAG                    | <u>GAATTC</u> CTACTCCACCTTGCTAATCC        |
| <b>Y2H-AD-FaMYB44.3</b> | NdeI/EcoRI  | CATATGATGGATTGCGAATCGGTTCAAG<br>CAGA         | <u>GAATTC</u> TACGAGAGCTTGGTATACCAAGG     |
| <b>Y2H-AD-FabHLH3</b>   | EcoRI/BamHI | <u>GAATTC</u> ATGGGTGAGAAGCTTTGGGT<br>GAAT   | <u>GGATCC</u> TTACACGGATGATTTTGAAGAGC     |
| <b>Y2H-BD-FabHLH3</b>   | EcoRI/BamHI | <u>GAATTC</u> ATGGGTGAGAAGCTTTGGGT<br>GAAT   | <u>GGATCC</u> TTACACGGATGATTTTGAAGAGC     |
| <b>Y2H-AD-FabHLH33</b>  | NdeI/EcoRI  | CATATGATGCGGATAATTGAAAACCC<br>ATGCT          | <u>GAATTC</u> TAACTTACCAGCAATTTTCCAA      |
| <b>Y2H-BD-FabHLH33</b>  | NdeI/EcoRI  | CATATGATGCGGATAATTGAAAACCC<br>ATGCT          | <u>GAATTC</u> TAACTTACCAGCAATTTTCCAA      |
| <b>Y2H-AD-FaTTG1</b>    | NdeI/XmaI   | CATATGATGGAGAATTCGACCCTCGA<br>ATCCCACC       | <u>CCCGGG</u> TCAAACCTTCAAGAGCTGCATCTTGTT |
| <b>Y2H-BD-FaTTG1</b>    | NdeI/XmaI   | CATATGATGGAGAATTCGACCCTCGA<br>ATCCCACC       | <u>CCCGGG</u> TCAAACCTTCAAGAGCTGCATCTTGTT |
| <b>Y2H-AD-FaMYB1</b>    | NdeI/XmaI   | CATATGATGAGGAAGCCCTGCTGCGA<br>GA             | <u>CCCGGG</u> TAAAGCAACTTGAGGATCAGCCA     |
| <b>Y2H-AD-FaMYB10</b>   | EcoRI/BamHI | <u>GAATTC</u> ATGGAGGGTTATTTCCGGTGTG         | <u>GGATCC</u> TACATCGTAGGAGATGTTGACTAGAT  |
| <b>PMDC83-FaMYB44.2</b> | SpeI/AscI   | <u>ACTAGTAT</u> GGCTTCTTCTCAACCAAG<br>AAAGC  | <u>GGCGGC</u> CTCTCCACCTTGCTAATCCCAATC    |
| <b>SPYCE-FaMYB44.1</b>  | SpeI/XhoI   | <u>ACTAGTAT</u> GGCTATGAATCGGAAGGA<br>AAT    | <u>CTCGAG</u> CTCAATTCTGCTGATCCCAATTC     |
| <b>SPYNE-FaMYB44.2</b>  | SpeI/SalI   | <u>ACTAGTAT</u> GGCTTCTTCTCAACCAAG<br>AA     | <u>GTCGAC</u> CTCCACCTTGCTAATCCCAATCC     |
| <b>SPYCE-FaMYB44.2</b>  | SpeI/SalI   | <u>ACTAGTAT</u> GGCTTCTTCTCAACCAAG<br>AA     | <u>GTCGAC</u> CTCCACCTTGCTAATCCCAATCC     |
| <b>SPYCE-FaMYB44.3</b>  | SpeI/XhoI   | <u>ACTAGTAT</u> GGATTGCGAATCGGTTCAAG<br>CAGA | <u>CTCGAG</u> CGAGAGCTTGGGTATACCAAGGTGC   |
| <b>SPYNE-FaMYB10</b>    | BamHI/SmaI  | <u>GGATCC</u> ATGGAGGGTTATTTCCGGTGTG<br>AGA  | <u>CCCGGG</u> GAGATGTTGACTAGATCT          |
| <b>SPYCE-FaMYB10</b>    | BamHI/SmaI  | <u>GGATCC</u> ATGGAGGGTTATTTCCGGTGTG<br>AGA  | <u>CCCGGG</u> GAGATGTTGACTAGATCT          |
| <b>SPYCE-FaMYB1</b>     | BamHI/SmaI  | <u>GGATCC</u> ATGAGGAAGCCCTGCTGCGA<br>GA     | <u>CCCGGG</u> GAGCAACTTGAGGATCAGCCATTC    |
| <b>SPYCE-FabHLH3</b>    | SpeI/XhoI   | <u>ACTAGTAT</u> GGGTGAGAAGCTTTGGGT<br>GAAT   | <u>CTCGAG</u> CACGGATGATTTTGAAAGAGCAGC    |
| <b>SPYCE-FabHLH33</b>   | BamHI/SmaI  | <u>GGATCC</u> ATGCGGATAATTGAAAACCC<br>ATGCT  | <u>CCCGGG</u> GACACTTACCAGCAATTTCCAAAGC   |

|                       |            |                                            |                                            |
|-----------------------|------------|--------------------------------------------|--------------------------------------------|
| <b>SPYCE-FaTTG1</b>   | BamHI/SmaI | <u>GGATCCATGGAGAATTCGACCCTCGA</u><br>ATCC  | <u>CCCGGGAACCTTCAAGAGCTGC</u><br>ATCTTGTT  |
| <b>SPYCE-FaMADS9</b>  | BamHI/SmaI | <u>GGATCCATGGGGAGGGGAAGAGTGGA</u><br>GC    | <u>CCCGGGGAGCATCCAACCAGGA</u><br>ATGAAA    |
| <b>nLUC-FaMYB44.2</b> | SacI/SalI  | <u>GAGCTCATGGCTTCTTCTTCAACCAAG</u><br>A    | <u>GTCGACCTCCACCTTGCTAATCC</u><br>CAATCC   |
| <b>cLUC-FaMYB44.2</b> | Sall/PstI  | <u>GTCGACATGGCTTCTTCTTCAACCAAG</u><br>AAAG | <u>CTGCAGCTACTCCACCTTGCTAA</u><br>TCCCAATC |
| <b>cLUC-FabHLH3</b>   | KpnI/BamHI | <u>GGTACCATGGGTGAGAAGCTTTGGGT</u><br>GAAT  | <u>GGATCCTTACACGGATGATTTTG</u><br>AAAGAGC  |
| <b>cLUC-FaTTG1</b>    | KpnI/BamHI | <u>GGTACCATGGAGAATTCGACCCTCGA</u><br>ATC   | <u>GGATCCTCAAACCTTCAAGAGC</u><br>TGCATC    |

**Table S3 Primers used for gene expression analysis by qRT-PCR.**

| Gene             | Full Name                           | Gene ID   | Forward primer<br>(5'-3')       | Reverse primer<br>(5'-3')  | Note<br>(related ripening parameter) |
|------------------|-------------------------------------|-----------|---------------------------------|----------------------------|--------------------------------------|
| <i>FaMYB44.1</i> | MYB domain<br>protein 44.1          | gene24027 | ATCTCCAACCT<br>CGCTGTCC         | GCCTGTTCTGAG<br>TCGACTC    | ---                                  |
| <i>FaMYB44.2</i> | MYB domain<br>protein 44.2          | gene00185 | CTCATTCGCAAG<br>CAGCCTTC        | GCTGAGTGATGTC<br>GGTGGAT   | Sugar and acid accumulation          |
| <i>FaMYB44.3</i> | MYB domain<br>protein 44.3          | gene26289 | GCGCATTCGAA<br>ATACGGCAA        | CATGGACGAGTA<br>CTTCCGCT   | ---                                  |
| <i>FaSUS1</i>    | Sucrose<br>synthase 1               | gene12940 | CCCTGATTCTGA<br>CCTTTACTGG      | GATGATGAAGTC<br>GGTGTGGTT  | Sugar metabolism                     |
| <i>FaSUS2</i>    | Sucrose<br>synthase 2               | gene11077 | TTGCTGAGGAT<br>GTTGCAGGT        | AACAACGAGGCG<br>ACGAGATT   | Sugar metabolism                     |
| <i>FaSPS1</i>    | Sucrose-<br>phosphate<br>synthase 1 | gene11606 | GAGCCTTGAAT<br>GTCCCAATGT       | ATCTCCTGTCTGG<br>TGCTGGTT  | Sugar metabolism                     |
| <i>FaSPS2</i>    | Sucrose-<br>phosphate<br>synthase 2 | gene22863 | ACTGTGCAAAG<br>TTGGCGTCTT       | GATCATCGCAATC<br>CACGGCTA  | Sugar metabolism                     |
| <i>FaSPS3</i>    | Sucrose-<br>phosphate<br>synthase 3 | gene31122 | CGTAGATTGGA<br>GTTATGGAGAG<br>C | CGAATGATGTAA<br>GAACCACTGC | Sugar metabolism                     |
| <i>FaSUTI</i>    | Sucrose<br>transport<br>protein 1   | gene26850 | GAGTGTTTGTGT<br>TTGGGTTTTG      | CGATGGTCCTTTC<br>CAGTGA    | Sucrose transporter                  |
| <i>FaNI</i>      | Neutral<br>invertase                | gene05019 | CGACCTCGGTG<br>GATAGTCAG        | CCACATCACCATT<br>CCCCGTC   | Sugar metabolism                     |
| <i>FaHXKI</i>    | Hexokinase 1                        | gene11313 | AGCATTGGATG<br>GTGGCTTGT        | TATGTGCTCGGCG<br>ACATCAT   | Sugar metabolism and signaling       |

|                              |                                                   |           |                            |                            |                                |
|------------------------------|---------------------------------------------------|-----------|----------------------------|----------------------------|--------------------------------|
| <b><i>FaHXK2</i></b>         | Hexokinase 2                                      | gene08515 | GCTGTCACCGA<br>GCTTCTAGG   | CAGCCCCTATACC<br>AGACCCA   | Sugar metabolism and signaling |
| <b><i>FaTPS7</i></b>         | Trehalose<br>phosphate<br>synthase 7              | gene29717 | CTGCTGTGAGG<br>GATGGGATG   | CTTGGGCCCACTG<br>GATTCTG   | Sugar metabolism and signaling |
| <b><i>FaFRK4</i></b>         | Fructokinase 4                                    | gene21673 | GCCTTGCTCTCC<br>TATGACCC   | TGACCTTGATCAC<br>GTCTGCC   | Sugar metabolism and signaling |
| <b><i>FaCS1</i></b>          | Citrate<br>synthase 1                             | gene00583 | ATCCTGATGCC<br>AATCCTGCC   | TGGTGCCTCCCA<br>AGAATCC    | Citric acid accumulation       |
| <b><i>FaCS2</i></b>          | Citrate<br>synthase 2                             | gene05118 | CATCCCACTGC<br>CGATGTCTT   | GACTCTGATGGTT<br>GGCTGCT   | Citric acid accumulation       |
| <b><i>FaVHA-A</i></b>        | V-type proton<br>ATPase<br>catalytic<br>subunit A | gene05361 | AGAGCGAGTTT<br>GGCTACGTC   | CATTTCCGACACG<br>AACCAGC   | Acid metabolism                |
| <b><i>FaMDH1</i></b>         | Malate<br>dehydrogenase<br>1                      | gene05605 | GGTGTCAAGA<br>AAGCCGGGA    | CCCAGAACCTCTG<br>CCACAAA   | Malic acid metabolism          |
| <b><i>FaMDH2</i></b>         | Malate<br>dehydrogenase<br>2                      | gene11464 | TGTGACCACAT<br>CCGGGATTG   | AGCTGGTACACCG<br>TATGAGC   | Malic acid metabolism          |
| <b><i>FaGAD</i></b>          | Glutamate<br>decarboxylase                        | gene09305 | GCCTACACTAT<br>GCCAGCCAA   | GAGTCTCTCTGCC<br>AAGCTCC   | Acid metabolism                |
| <b><i>FaNADP-<br/>ME</i></b> | NADP-<br>dependent<br>malic enzyme                | gene11286 | TGGTGACCTTG<br>GTTGTCAGG   | GGCAAACATGTTG<br>AGGGACG   | Malic acid metabolism          |
| <b><i>FaAco</i></b>          | Aconitate<br>hydratase                            | gene23775 | CCTTACAGCTT<br>CGCTCTCA    | ATGACTTTCCGGA<br>GCCATGG   | Acid metabolism                |
| <b><i>FaVHP</i></b>          | Vacuolar<br>membrane<br>proton pump               | gene30771 | GTGGGAAGTGC<br>TGCTCTGAA   | AGCATAGTCAGG<br>CTTGGCAG   | Acid metabolism                |
| <b><i>FaAMY3</i></b>         | Alpha-amylase<br>3                                | gene04016 | TAGCTGCGACG<br>TTTGAGTCC   | CCCGTGATCCAAC<br>CTCACAT   | Starch metabolism              |
| <b><i>FaBAM1</i></b>         | Beta-amylase<br>1                                 | gene28316 | GGGACATGGTC<br>ATCCCTGG    | GTGCTACCCATT<br>CTGGCTT    | Starch metabolism              |
| <b><i>FaFUM1</i></b>         | Fumarate<br>hydratase 1                           | gene11092 | GGACGTACTCA<br>CACGCAAGA   | TGCACAAGACTCG<br>CTCGATT   | Starch metabolism              |
| <b><i>FaADSS</i></b>         | Adenylosuccin<br>ate synthase                     | gene03239 | GGTGTGTGGT<br>GCATCTTCC    | GGTGAGCACGATC<br>AGAGACC   | Starch metabolism              |
| <b><i>FaQR</i></b>           | Quinone<br>oxidoreductase                         | gene28406 | CACTGACTCTCC<br>CCTACCTACA | ATACACTTCATCC<br>CCCACCTTA | Aroma production               |
| <b><i>FaEXPI</i></b>         | Expansin 1                                        | gene18424 | AGGACGGAGTT<br>GGATTGC     | TGAGCGTGAGCGT<br>GAAG      | Softness                       |



|                 |                                                              |                        |                                                      |                                                      |                                          |
|-----------------|--------------------------------------------------------------|------------------------|------------------------------------------------------|------------------------------------------------------|------------------------------------------|
| <b>FaEXP3</b>   | Expansin 3                                                   | gene04435              | TCACTGCCACTA<br>ACTTCTGC                             | TTATGCCTCTGC<br>TCTCCT                               | Softness                                 |
| <b>FaXYLI</b>   | Xylosidase 1                                                 | gene05164              | ATGGAAGCCT<br>ACTTGTGCTG                             | CTGGTGAATGTT<br>GTTGGTCGT                            | Softness                                 |
| <b>FaCHS</b>    | Chalcone<br>synthase                                         | gene26825              | GCCTTTGTTTGG<br>CTGGCT                               | CCCAGGAACATCT<br>TTGAGGA                             | Anthocyanin accumulation                 |
| <b>FaCHI</b>    | Chalcone--<br>flavonone<br>isomerase                         | gene23367              | AGCGAAAGCCA<br>TTGAAAAGT                             | CATTTGGTGATTG<br>TGTGAAGAG                           | Anthocyanin accumulation                 |
| <b>FaPAL</b>    | Phenylalanine<br>ammonia-lyase                               | gene23261              | CTTCTGTGGTGC<br>TGTTGATG                             | AGGGTGGTGCTTC<br>AGTTTATGT                           | Flavonoid metabolism                     |
| <b>FaMADS9</b>  | MADS-box<br>transcription<br>factor 9                        | gene04229              | ACGCTGAGGTT<br>GCTCTCATC                             | AGGACTCTAGCTG<br>ACGCTCA                             | Ripening-related transcription<br>factor |
| <b>FaSHP</b>    | SHATTERPR<br>OOF-like<br>MADS-box<br>transcription<br>factor | gene24494<br>gene04563 | TGATCCTGAGA<br>GCTCTCCCA<br>GAGAAGGAACG<br>GGTTGCTGA | GCGCTTGCAGAAT<br>GTGACTT<br>ACTCATAGAGCTT<br>GCCACGG | Ripening-related transcription<br>factor |
|                 | MADS-box<br>transcription<br>factor                          | gene26118              | GTGCTCCACTTC<br>ATCTGGCA                             | TGCTGAAAGAAA<br>CCTTGCGAC                            |                                          |
| <b>FaMYB1</b>   | MYB domain<br>protein 1                                      | gene09407              | TAGCTGGAAGA<br>CTGCCTGGA                             | GGACGAAGAGTA<br>GTGCCTGT                             | Anthocyanin accumulation                 |
| <b>FaMYB10</b>  | MYB domain<br>protein 10                                     | gene31413              | CAACAGCACCA<br>CCACAGACT                             | GCTTGCCGATTGT<br>ACCGTAT                             | Anthocyanin accumulation                 |
| <b>FaEOBII</b>  | Emission of<br>benzenoid II                                  | gene28435              | GCAGATCAGGC<br>AAGCACAAG                             | GAGGCTGAACCA<br>GAGTTGCT                             | Aroma production                         |
| <b>FaGAMYB</b>  | Transcription<br>factor<br>GAMYB                             | gene00431              | ATCCAATGTGAA<br>ACCTGAACCA                           | CCAGCCAATCTGA<br>ACCAAGTAA                           | Anthocyanin accumulation                 |
| <b>FabHLH3</b>  | Basic helix-<br>loop-helix 3                                 | gene08231              | CAGGAGTTGTG<br>GAGCTTGGT                             | GCCTGGACAGAG<br>CTAGGAAC                             | Ripening-related transcription<br>factor |
| <b>FabHLH33</b> | Basic helix-<br>loop-helix 33                                | gene19321              | TGACAAGGCAT<br>CGATCCTCG                             | GTGCTTCCACAGT<br>GTCCATG                             | Ripening-related transcription<br>factor |
| <b>FaTTG1</b>   | Transparent<br>testa glabra 1                                | gene12450              | GGACTTGAGGT<br>ACATGGCGA                             | ATTCACACTCCCT<br>CTGTGCC                             | Ripening-related transcription<br>factor |
| <b>FaCOII</b>   | Coronatine-<br>insensitive<br>protein 1                      | gene20913              | GAGGAGATTGC<br>GGAGTCGTT                             | CGGAGCACTTGTC<br>CAGCTTA                             | JA receptor                              |
| <b>FaJAZI</b>   | Jasmonate-<br>zim-domain<br>protein 1                        | gene12541              | AACCTCGTCGA<br>CATGCAGTT                             | ATTGAAGCCTCT<br>GGGAGCC                              | JA signaling                             |

|                         |                                      |           |                            |                             |                                 |
|-------------------------|--------------------------------------|-----------|----------------------------|-----------------------------|---------------------------------|
| <b><i>FaJAZ2</i></b>    | Jasmonate-zim-domain protein 2       | gene00583 | AGACATGCAAC<br>CTCCTCAGC   | GATCTCCTGGCC<br>TTCTCCG     | JA signaling                    |
| <b><i>FaJAZ8</i></b>    | Jasmonate-zim-domain protein 8       | gene30624 | ATTGGAGCTCC<br>GCCTTAAT    | GAAGATCGTCAAT<br>GGCTGCT    | JA signaling                    |
| <b><i>FaMYC2</i></b>    | Transcription factor MYC2            | gene10501 | CTCTCCGAGCT<br>GTTGTTCCA   | TCTGACTCCGTCG<br>TTTGACG    | JA signaling                    |
| <b><i>FaOPR3</i></b>    | Oxophytodien oate reductase 3        | gene12480 | GGAGCCGTTATT<br>TTCTGTCAGC | TCAAAACCTGCTC<br>GAATGGC    | JA biosynthesis                 |
| <b><i>FaARF6A</i></b>   | Auxin response factor 6A             | gene22728 | TGAAGTGCAAC<br>AAATGGGAA   | CGGCTTACGTAGT<br>CGTCACA    | Auxin signaling                 |
| <b><i>FaARF6B</i></b>   | Auxin response factor 6B             | gene30394 | TGGCTTGCAGA<br>CAGACATGT   | GCAGAAGGGACG<br>TAGGTAGC    | Auxin signaling                 |
| <b><i>FaPIN8</i></b>    | Auxin efflux carrier component 8     | gene16792 | ACCCTCCCACTC<br>TTCACCTT   | GCACAACCACGAT<br>GATGAGC    | Auxin transporter               |
| <b><i>FaMRLK47</i></b>  | FERONIA/FE R-like receptor kinase 47 | gene13568 | GCTTAGGTCTTG<br>GTATGATGA  | TAGTTGAGGTTGA<br>TGTGTATTTC | Ripening-related protein kinase |
| <b><i>FaPYL1</i></b>    | Pyrabactin resistance like 1         | gene10508 | GCTTCGTAATGA<br>GCGTGGGA   | CTCTCCTCGTCCA<br>GCAAGTC    | ABA receptor                    |
| <b><i>FaPYL8</i></b>    | Pyrabactin resistance like 8         | gene13100 | GGAGGAGGTGC<br>GAGTGAGTA   | TGAACAGGCGCTT<br>TGATGTG    | ABA receptor                    |
| <b><i>FaPYL9</i></b>    | Pyrabactin resistance like 9         | gene19210 | ACTGGAGCTTC<br>TGGATGACG   | ACCTCAGGATGGA<br>CGGTGAT    | ABA receptor                    |
| <b><i>FaSnRK2.6</i></b> | SNF1-related protein kinase2.6       | gene31902 | GCTACACTCGC<br>AACCAAAATC  | ACCCCAAGAC<br>CAGACATC      | Ripening-related protein kinase |
| <b><i>FaNCED1</i></b>   | 9-cis-epoxycarotenoid dioxygenase 1  | gene31335 | ACTGCTTCTGCT<br>TCCATCTCT  | AGACACTCGTCGC<br>ATTCATT    | ABA biosynthesis                |
| <b><i>FaNCED2</i></b>   | 9-cis-epoxycarotenoid dioxygenase 2  | gene30616 | GACACCTTTTGC<br>TTCCACTTG  | GGATTTCGGACAA<br>CACACTCT   | ABA biosynthesis                |

|                |                                                |           |                           |                             |                  |
|----------------|------------------------------------------------|-----------|---------------------------|-----------------------------|------------------|
| <i>FaNCED3</i> | 9-cis-<br>epoxycaroteno<br>id dioxygenase<br>3 | gene24386 | CAAACCTATCA<br>CCCTTCTCAC | TGGGCAACTTCTG<br>CTTCTTT    | ABA biosynthesis |
| <i>FaACTIN</i> | Actin protein                                  | gene22626 | GCCAACCGTGA<br>GAAGATG    | TCCAGAGTCAAG<br>AACAATACCAG | ---              |

**Table S4. Primers used to construct the vectors for the GUS activity assay.** The enzyme sites in the primer sequences are underlined.

| Primer name                     | Enzyme sites | Forward primer (5'-3')                          | Reverse primer (5'-3')                               |
|---------------------------------|--------------|-------------------------------------------------|------------------------------------------------------|
| PBI121-FaMYB10                  | XbaI/SacI    | <u>TCTAGA</u> ATGGAGGGTTATTTCCGGTGTG            | <u>GAGCTC</u> GGATCCTCATACTAGTAG<br>GAGATGTTGACTAGAT |
| 1304- <i>P<sub>FaSP53</sub></i> | NcoI/BglII   | <u>CCATGGTT</u> AGCGTCTACTCTCCACAGT<br>TTCCTGCC | <u>AGATCT</u> CGTCGGAGCTCGAATTC<br>AGACCAAATC        |
| 1304-FaMYB44.2                  | EcoRI/XhoI   | <u>GAATTC</u> ATGGCTTCTTCTCAACCAAG<br>AAAGC     | <u>CTCGAG</u> CTACTCCACCTTGCTAA<br>TCCCAATCC         |
| 1304-FabHLH3-S                  | PstI/BamHI   | <u>CTGCAGAT</u> GGGTGAGAAGCTTTGGGT<br>GAATGA    | <u>GGATCCTT</u> ACACGGATGATTTTG<br>AAAGAGCAG         |
| 1304-FabHLH3-D                  | PstI/SalI    | <u>CTGCAGAT</u> GGGTGAGAAGCTTTGGGT<br>GAATGA    | <u>GTCGACTT</u> ACACGGATGATTTTG<br>AAAGAGCAG         |
| 1304-FaTTG1-S                   | HindIII/XbaI | <u>AAGCTT</u> ATGGAGAATTCGACCCTCGAA<br>TCC      | <u>TCTAGAT</u> CAAACCTTCAAGAGCT<br>GCATC             |
| 1304-FaTTG1-D                   | BamHI/KpnI   | <u>GGATCC</u> ATGGAGAATTCGACCCTCGAA<br>TCC      | <u>GGTACCT</u> CAAACCTTCAAGAGC<br>TGCATC             |

**Table S5. Probes used for the EMSA.** The sequences of cis-elements are underlined.

| Primer name                            | Forward primer (5'-3')                                 | Reverse primer (5'-3')                                         |
|----------------------------------------|--------------------------------------------------------|----------------------------------------------------------------|
| <i>P<sub>FaSP53</sub></i> -MBS         | ATTGCATTTTAGTTTT <u>CAACTG</u> TTTTACGT<br>GTTTAGTCAG  | CTGACTAAACACGTAAAACAGTTGAAAACCTA<br>AAATGCAAT                  |
| <i>P<sub>FaSP53</sub></i> -CGTCA-motif | ATCAATTTTCTTTGGAAT <u>GACGAGT</u> GATG<br>GTAAACTAAA   | TTTAGTTTACCATACT <u>CGTCA</u> TTCCAAAGA<br>AAATTGAT            |
| <i>P<sub>FaSP53</sub></i> -TGA-element | TTAAACTAGGGTGGAAC <u>GACAG</u> AGATA<br>AGGCGTTTACG    | CGTAAACGCCTTATCTCT <u>GTCGTT</u> TCCACCCT<br>AGTTTAA           |
| <i>P<sub>FaCS</sub></i> -MBS           | TGTGGTGAACAT <u>AACTG</u> CTTTCTTAATTGA<br>TTACTTTAAA  | TTTAAAGTAATCAATTAAGAAAG <u>CAGTT</u> ATG<br>TTCACCACA          |
| <i>P<sub>FaSUS1</sub></i> -HSE+TC-rich | GTGGGTAAGAGAAAATTCATAGTCTTCTG<br>GGAAGAAAATATAGTATATAT | ATATATACTATATTTTCTTCCAGAAAGACTAT<br><u>GAATTTTCTCTT</u> ACCCAC |
| <i>P<sub>FaSUS1</sub></i> -TC-rich     | CCAAGTCTTGCATTTACTCCAATTTCTGTT<br>TCGCGCTTCT           | AGAAGCGCGAAAACAGAAAT <u>TGGAGTAAAT</u> GC<br>AAAGACTTGG        |

|                                       |                                                                                 |                                                                                 |
|---------------------------------------|---------------------------------------------------------------------------------|---------------------------------------------------------------------------------|
| <b>P<sub>FaSUS1</sub>-TATCCAT</b>     | TATACAGAAAAGGAGAGAT <u>TCCATGGATG</u><br>GACATGCAAGA                            | TCTTGCATGTCCATCCATGGATACTCTCCTTT<br>TCTGTATA                                    |
| <b>P<sub>FaHXX2</sub>-G-box</b>       | AATAAAAACCA <u>ACGTGTTGATCTCATACT</u><br>TCATTTTCGTAGATCT <u>CCACGTAATAACTG</u> | CAGTTATT <u>ACGTGGAGATCTACGAAAATGAA</u><br>GTATGAGATCAAC <u>ACGTTGGTTTTTATT</u> |
| <b>P<sub>FaHXX2</sub>-ABRE</b>        | TTCGTAGATCTCC <u>ACGTAATAACTGTAACC</u>                                          | GGTTACAGTTATT <u>ACGTGGAGATCTACGAA</u>                                          |
| <b>P<sub>FaHXX2</sub>-MBS</b>         | TCCACGTAATA <u>ACTGTAACCGTACGTC</u> AA<br>CCA <u>ACTCAGCA</u>                   | TGCTGAGTTGGTTGACGTACGGTT <u>ACAGTTA</u><br>TTACGTGGA                            |
| <b>P<sub>FaHXX2</sub>-CGTCA-motif</b> | TAGTAGCTGCGCTTCC <u>GTTCATGCTCCATGG</u><br>ACCAAT <u>GACGATCGTAACT</u>          | AGTTTACGAT <u>CGTCATTGGTCCATGGAGCAT</u><br><u>GACGGAAGCGCAGCTACTA</u>           |
| <b>P<sub>FaHXX2</sub>-TATCCAT</b>     | TCACTATGTCAAATGAAACT <u>TATCCATGGG</u><br>CGGCAACTCGA                           | TCGAGTTGCCGCCAT <u>TGGATAGTTTCATTG</u> A<br>CATAGTGA                            |
| <b>P<sub>FaMDH1</sub>-MBS</b>         | TTCTTGCTTTCTGAAACTGATA <u>ACTGATTC</u><br>AAATTGTGAT                            | ATCACAATTTGAAT <u>CAGTTATCAGTTTCAGA</u><br>AAGCAAGAA                            |
| <b>P<sub>FaMDH1</sub>-TATCCAT</b>     | TTTATGTCTGATAACGTGGTT <u>TATCCATGA</u><br>CATTGTATTT                            | AAATACAATGTCA <u>TGGATAAACCACGTTATC</u><br>AGACATAAA                            |

**Table S6. Sequences and primers used for microRNA expression analysis by qRT-PCR.**

| miRNA family   | miRNA name         | Forward primer (5'-3')        | Sequence              |
|----------------|--------------------|-------------------------------|-----------------------|
| <b>miR159</b>  | <b>fve-miR159a</b> | ATTGGATTGAAGGGAGCTCTC         | AUUGGAUUGAAGGGAGCUCUC |
| <b>miR159b</b> | <b>fve-miR159b</b> | CGTTGGATTGAAGGGAGCTCTA        | UUUGGAUUGAAGGGAGCUCUA |
| <b>miR828</b>  | <b>fve-miR828</b>  | GCCTCTTGCTTAAATGAGTATTC<br>CA | UCUUGCUUAAAUGAGUAUUC  |
| <b>miR156</b>  | <b>fve-miR156a</b> | GCTTGACAGAAGAGAGTGAGCA<br>C   | UUGACAGAAGAGAGUGAGCAC |
| <b>miR156</b>  | <b>fve-miR156h</b> | GCCTGACAGAAGAGAGTGAGCT<br>C   | UGACAGAAGAGAGUGAGCUC  |
| <b>miR399</b>  | <b>fve-miR399a</b> | TGCCAAAGGAGAGTTGCCCT          | UGCCAAAGGAGAGUUGCCCUG |
| <b>miR319</b>  | <b>fve-miR319a</b> | CTTGACTGAAGGGTGCTCCTT         | CUUGGACUGAAGGGUGCUCCU |
| <b>U6</b>      |                    | GGGGACATCCGATAAAATT           |                       |

**Table S7. Primers used for gene expression analysis by RT-PCR.**

| Gene             | Full Name                    | Gene ID   | Forward primer (5'-3')         | Reverse primer (5'-3')          |
|------------------|------------------------------|-----------|--------------------------------|---------------------------------|
| <i>FaSUS1</i>    | Sucrose synthase 1           | gene12940 | TCCGATATTCCTCGTGTTC            | TGATGTTCTTTACACGGTCCA           |
| <i>FaSUS2</i>    | Sucrose synthase 2           | gene11077 | GAATGATCCATCAAAGCCC            | AGACATACTTCCAGAAACCGTA          |
| <i>FaSPS3</i>    | Sucrose-phosphate synthase 3 | gene31122 | CCGCATGGTGGTAATTCCTC           | CCCTTTGTCTTTGCTGCGAGA           |
| <i>FaMYB44.2</i> | MYB domain protein 44.2      | gene00185 | TCAAGCGCAAATTCTCGTCC<br>ATGTCC | GAACTGCTTATCAATCCCCACCTC<br>ACT |

|                |                                       |           |                            |                                |
|----------------|---------------------------------------|-----------|----------------------------|--------------------------------|
| <i>FaMADS9</i> | MADS-box<br>transcription factor<br>9 | gene04229 | ATGGGGAGGGGAAGAGTGG<br>AGC | GAGCATCCAACCAGGAATGAAA         |
| <i>FaMYB10</i> | MYB domain<br>protein 10              | gene31413 | ATGGAGGGTATTTCGGTGT<br>G   | TCATACGTAGGAGATGTTGACTA<br>GAT |
| <i>FaACTIN</i> | Actin protein                         | gene22626 | TGGGTTTGCTGGAGATGAT        | CAGTTAGGAGAACTGGGTGC           |

**Table S8. *FaSUS*, *FaSPS* and *FabHLH33* expression at different developmental and ripening stages according to RNA-sequence data.** The RNA-seq was performed with diploid strawberry (*Fragaria × ananassa* ‘Benihoppe’). RPKM (Reads Per Kilobase Million) value was used to present the gene expression levels, while the changed fold of genes was calculated using the log<sub>2</sub> ratio of RPKM value between two different samples. Gene ID of *FaSUS*s and *FaSPS*s were obtained using the protein sequences of *AtSUS* and *AtSPS* as queries BLAST against the strawberry genome database.

| Gene Description             |           | Expression Level (RPKM) |             |           | Fold Change (Log <sub>2</sub> *) |             |
|------------------------------|-----------|-------------------------|-------------|-----------|----------------------------------|-------------|
| Gene Name                    | Gene ID   | Green fruit             | White fruit | Red fruit | White/Green *                    | Red/White * |
| Sucrose synthase 1           | gene12940 | 213.37                  | 146.73      | 48.83     | -0.54                            | -1.58       |
| Sucrose synthase 2           | gene11077 | 37.68                   | 44.91       | 74.31     | 0.25                             | 0.72        |
| Sucrose synthase 3           | gene07050 | 1.75                    | 0.76        | 0.05      | -1.19                            | -3.89       |
| Sucrose synthase 4           | gene11429 | 5.89                    | 6.14        | 3.73      | 0.06                             | -0.71       |
| Sucrose synthase 5           | gene31666 | 6.64                    | 5.36        | 0.87      | -0.30                            | -2.62       |
| Sucrose-phosphate synthase 1 | gene11606 | 0.65                    | 0.56        | 4.68      | -0.22                            | 3.06        |
| Sucrose-phosphate synthase 2 | gene22863 | 7.89                    | 14.38       | 15.23     | 0.86                             | 0.08        |
| Sucrose-phosphate synthase 3 | gene31122 | 52.34                   | 91.67       | 156.54    | 0.81                             | 0.77        |
| Sucrose-phosphate synthase 4 | gene06523 | 1.62                    | 1.43        | 0.40      | -0.17                            | -1.83       |
| Sucrose-phosphate synthase 5 | gene31164 | 19.03                   | 11.61       | 9.41      | -0.71                            | -0.30       |
| Sucrose-phosphate synthase 6 | gene04429 | 11.54                   | 12.67       | 7.65      | 0.13                             | -0.72       |
| Sucrose-phosphate synthase 7 | gene03841 | 0.13                    | 0.04        | 0.17      | -1.69                            | 2.04        |
| Sucrose-phosphate synthase 8 | gene04408 | 9.34                    | 10.96       | 14.37     | 0.23                             | 0.39        |

|                 |           |      |      |      |      |      |
|-----------------|-----------|------|------|------|------|------|
| <b>FabHLH33</b> | gene19321 | 0.10 | 0.18 | 0.88 | 0.75 | 0.07 |
|-----------------|-----------|------|------|------|------|------|

**Table S9. Quantitative analysis of *FaMYB10* and *FaMYB44.2* expression levels by qRT-PCR.** The  $2^{-\Delta\Delta CT}$  method was used to calculate transcript levels (Schmittgen and Livak, 2008). Transcript values were normalized using *FaACTIN* as an internal control. The  $\Delta CT$  of small green fruit was chosen as the calibrator (Livak & Schmittgen, 2001). The ratio of gene expression levels in different fruit stages between *FaMYB10* and *FaMYB44.2* was calculated by transcript values. Three biological replicates were repeated.

| <b>Fruit Stage</b> | <b>Ratio of gene expression levels</b>    |
|--------------------|-------------------------------------------|
| Green fruit        | <i>FaMYB10</i> : <i>FaMYB44.2</i> = 0.16  |
| White fruit        | <i>FaMYB10</i> : <i>FaMYB44.2</i> = 4.67  |
| Turning fruit      | <i>FaMYB10</i> : <i>FaMYB44.2</i> = 6.28  |
| Red fruit          | <i>FaMYB10</i> : <i>FaMYB44.2</i> = 13.22 |
